# Supplementary material for: H2O2 activated moxa ash via ball milling for ultrafast removal of mitoxantrone
Source: Royal Society of Chemistry journal article supplement (doi:10.1039/d3ra00988b), 2023-01-01
Supplement: d3ra00988b1.pdf [file d3ra00988b1.pdf]

## Supplementary Information

### **H<sub>2</sub>O<sub>2</sub> activated moxa ash via ball milling for ultrafast removal of mitoxantrone**

Wanqian Cai <sup>a</sup>, Chongbiao Zhang <sup>a</sup>, Yourong Wu <sup>a</sup>, Wei Wang <sup>a</sup>, Mei Lin <sup>b,\*\*</sup>, Tengfei Lin <sup>a</sup>,  
Cong Lin <sup>a</sup>, Min Gao <sup>a</sup>, Chunlin Zhao <sup>a</sup>, Xiao Wu <sup>a,\*</sup>

<sup>a</sup> College of Materials Science and Engineering, Fuzhou University, Fuzhou, 350108, China

<sup>b</sup> College of Environment and Resource Science, Fujian Normal University, Fuzhou, 350007,  
Fujian Province, China

\*Corresponding Author at: Institute of Materials Science and Engineering, Fuzhou University  
New Campus, Minhou College Town, Fuzhou, Fujian 350180, China.

Tel.: +8659122866535; Fax: +8659122866537.

E-mail address: [linmei706@fjnu.edu.cn](mailto:linmei706@fjnu.edu.cn) (M. Lin), [wuxiao@fzu.edu.cn](mailto:wuxiao@fzu.edu.cn) (X. Wu).

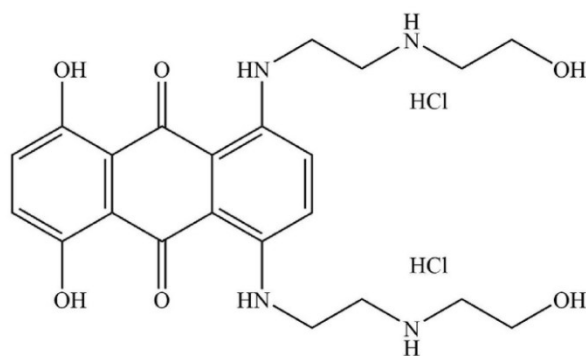

**Fig. S1** Chemical structure of mitoxantrone hydrochloride (MTX).

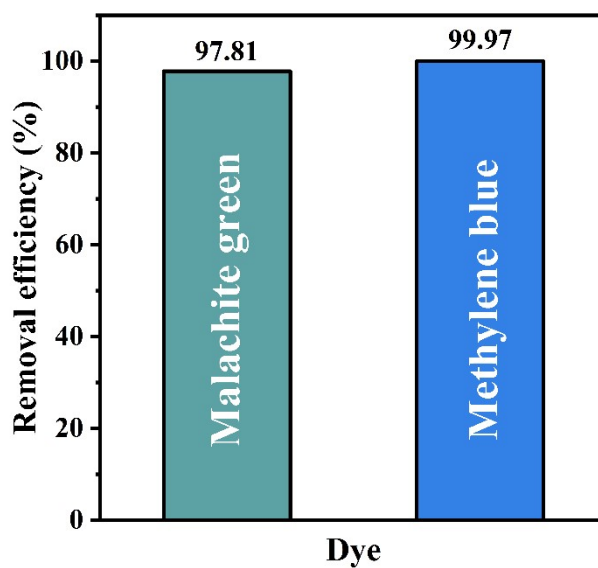

**Fig. S2** Removal efficiency of malachite green and methylene blue by BMMA-H<sub>2</sub>O<sub>2</sub>.

**Table S1** Basic morphology characteristics of MA, BMMA, BMMA-H<sub>2</sub>O and BMMA-H<sub>2</sub>O<sub>2</sub>.

| Sample                             | BET surface area<br>(m <sup>2</sup> /g) | BJH pore volume<br>(cm <sup>3</sup> /g) | BJH pore size<br>(nm) | pH   |
|------------------------------------|-----------------------------------------|-----------------------------------------|-----------------------|------|
| MA                                 | 2.89                                    | 0.0072                                  | 32.62                 | 10.1 |
| BMMA                               | 10.96                                   | 0.0333                                  | 20.92                 | 9.7  |
| BMMA-H <sub>2</sub> O              | 48.31                                   | 0.1343                                  | 16.12                 | 9.5  |
| BMMA-H <sub>2</sub> O <sub>2</sub> | 96.46                                   | 0.1801                                  | 10.26                 | 9.3  |

**Table S2** Adsorption kinetics parameters for the adsorption of MTX onto MA, BMMA, BMMA-H<sub>2</sub>O and BMMA-H<sub>2</sub>O<sub>2</sub>.

| Sample                             | Pseudo-first order |                |                | Pseudo-second order |                |                |
|------------------------------------|--------------------|----------------|----------------|---------------------|----------------|----------------|
|                                    | q <sub>e</sub>     | k <sub>1</sub> | R <sup>2</sup> | q <sub>e</sub>      | k <sub>2</sub> | R <sup>2</sup> |
| MA                                 | 33.2871            | 0.1383         | 0.8426         | 35.2707             | 0.006          | 0.9315         |
| BMMA                               | 38.6825            | 0.2074         | 0.9685         | 40.1468             | 0.0102         | 0.9960         |
| BMMA -H <sub>2</sub> O             | 39.1463            | 0.3132         | 0.9934         | 40.1176             | 0.0202         | 0.9995         |
| BMMA-H <sub>2</sub> O <sub>2</sub> | 39.7082            | 4.1179         | 0.9998         | 39.8182             | 1.1538         | 0.9999         |

**Table S3** Adsorption isotherm parameters for the adsorption of MTX onto MA, BMMA, BMMA-H<sub>2</sub>O and BMMA-H<sub>2</sub>O<sub>2</sub>.

| Sample                             | Langmuir       |                |                | Freundlich     |        |                |
|------------------------------------|----------------|----------------|----------------|----------------|--------|----------------|
|                                    | K <sub>L</sub> | Q <sub>m</sub> | R <sup>2</sup> | K <sub>F</sub> | n      | R <sup>2</sup> |
| MA                                 | 0.0295         | 355.0203       | 0.9201         | 26.7795        | 0.5169 | 0.9868         |
| BMMA                               | 0.7415         | 259.5376       | 0.8695         | 87.8421        | 0.3077 | 0.9903         |
| BMMA -H <sub>2</sub> O             | 1.8812         | 249.7822       | 0.8568         | 97.8981        | 0.2838 | 0.9768         |
| BMMA-H <sub>2</sub> O <sub>2</sub> | 4.7906         | 259.7557       | 0.8553         | 126.0242       | 0.2325 | 0.9293         |
